# Supplementary material for: The Schizophrenia Care Management Program for Family Caregivers of Chinese Patients With Schizophrenia
Source: Atypon-hosted journal article supplement (doi:10.1176/ps.2010.61.3.317), 2010-03-01
Supplement: appi.ps.2010.61.3.317.ds001.pdf [file appi.ps.2010.61.3.317.ds001.pdf]

**Table 1**

Socio-demographic characteristics of families receiving SCMP, usual care only, or those non-participants, at baseline measurement

| Characteristics           | SCMP<br>(n = 46) <sup>a</sup> | Usual Care<br>(n = 46) <sup>a</sup> | Non-<br>participants<br>(n = 408) <sup>a</sup> | Test<br>value <sup>b</sup> | p   |
|---------------------------|-------------------------------|-------------------------------------|------------------------------------------------|----------------------------|-----|
| <b>Family caregivers</b>  |                               |                                     |                                                |                            |     |
| Gender                    |                               |                                     |                                                | 0.93                       | .35 |
| Male                      | 21(45.7)                      | 20(43.5)                            | 130(43.3)                                      |                            |     |
| Female                    | 25(54.3)                      | 26(56.5)                            | 170(56.7)                                      |                            |     |
| Age                       | 40.9 ± 9.1,<br>22 - 61        | 41.8 ± 8.2,<br>21 - 62              | 40.2 ± 10.8,<br>20 - 68                        | 1.01                       | .26 |
| 20-29                     | 6(13.0)                       | 7(15.2)                             | 47(15.7)                                       |                            |     |
| 30-39                     | 14(30.4)                      | 15(32.6)                            | 99(33.0)                                       |                            |     |
| 40-49                     | 18(39.1)                      | 17(37.0)                            | 114(38.0)                                      |                            |     |
| 50 or above               | 8(17.4)                       | 7(15.2)                             | 40(13.3)                                       |                            |     |
| Education level           |                               |                                     |                                                | 1.41                       | .16 |
| Primary school or below   | 10(21.7)                      | 9(19.6)                             | 59(19.7)                                       |                            |     |
| Secondary school          | 25(54.3)                      | 27(58.7)                            | 178(59.3)                                      |                            |     |
| University or above       | 11(23.9)                      | 10(21.7)                            | 63(21.0)                                       |                            |     |
| Relationship with patient |                               |                                     |                                                | 1.52                       | .14 |
| Child                     | 8(17.4)                       | 8(17.4)                             | 51(17.0)                                       |                            |     |
| Parent                    | 17(37.0)                      | 16(34.8)                            | 114(38.0)                                      |                            |     |
| Spouse                    | 13(28.3)                      | 14(30.4)                            | 108(36.0)                                      |                            |     |
| Others (e.g., sibling and | 8(17.4)                       | 8(17.4)                             | 27( 9.0)                                       |                            |     |

| grandparent)             |               |               |               |      |     |
|--------------------------|---------------|---------------|---------------|------|-----|
| Monthly household income | 11,500± 1,024 | 10,940± 1,215 | 12,320± 1,862 | 1.98 | .11 |
| (HK\$) <sup>c</sup>      |               |               |               |      |     |
| 5,000 – 10,000           | 9(19.6)       | 9(19.6)       | 55(18.3)      |      |     |
| 10,001 – 15,000          | 20(43.5)      | 21(45.7)      | 135(45.0)     |      |     |
| 15,001 – 25,000          | 11(23.9)      | 9(19.6)       | 67(22.3)      |      |     |
| 25,001 – 35,000          | 6(13.0)       | 7(15.2)       | 43(14.3)      |      |     |
| <b>Patients</b>          |               |               |               |      |     |
| Gender                   |               |               |               | 1.87 | .12 |
| Male                     | 24(52.2)      | 25(54.3)      | 165(55.0)     |      |     |
| Female                   | 22(47.8)      | 21(45.7)      | 135(45.0)     |      |     |
| Age                      | 27.3 ± 5.0,   | 28.1 ± 6.5,   | 26.8 ± 9.1,   | 1.38 | .18 |
|                          | 20 - 46       | 19 - 45       | 18 - 48       |      |     |
| 19-29                    | 28(60.9)      | 30(65.2)      | 190(63.3)     |      |     |
| 30-39                    | 13(28.3)      | 12(26.1)      | 89(29.7)      |      |     |
| 40-49                    | 5(10.9)       | 4(10.9)       | 21( 7.0)      |      |     |
| Duration of illness      | 3.3 ± 2.2,    | 3.5 ± 2.1,    | 3.7 ± 3.0,    | 1.79 | .12 |
|                          | 3 months – 6  | 5 months – 5  | 3 months – 6  |      |     |
|                          | years         | years         | years         |      |     |
| 3 months – 1 year        | 7(15.2)       | 6 (13.0)      | 48 (16.0)     |      |     |
| 1 – 2 years              | 20(43.5)      | 22 (47.8)     | 129 (43.0)    |      |     |
| 2 – 4 years              | 16(34.8)      | 15 (32.6)     | 100 (33.3)    |      |     |
| 4 – 6 years              | 3( 6.5)       | 3 ( 6.5)      | 23 ( 7.7)     |      |     |
| Number of family members |               |               |               | 2.52 | .09 |

|                                                 |            |           |            |      |     |
|-------------------------------------------------|------------|-----------|------------|------|-----|
| living with patient                             |            |           |            |      |     |
| One                                             | 23 (50.0)  | 23 (50.0) | 170 (56.7) |      |     |
| 2 - 3                                           | 19 (41.3)  | 20 (43.5) | 110 (36.7) |      |     |
| 4 - 5                                           | 4 ( 8.7)   | 3 ( 6.5)  | 20 ( 6.7)  |      |     |
| Use of usual care services                      |            |           |            | 2.35 | .10 |
| Medical consultation and treatment planning     | 46 (100.0) | 45 (97.8) | 282 (94.0) |      |     |
| Nursing advice on services                      | 38 (82.6)  | 40 (87.0) | 220 (73.3) |      |     |
| Brief family education                          | 40 (87.0)  | 43 (93.5) | 251 (83.7) |      |     |
| Type of medication                              |            |           |            | 1.67 | .14 |
| Conventional antipsychotics (e.g., haloperidol) | 11 (23.9)  | 12 (26.1) | 72 (24.0)  |      |     |
| Atypical antipsychotics (e.g., olanzepine)      | 15 (32.6)  | 17 (37.0) | 114 (38.0) |      |     |
| Anti-depressants (e.g., Prozac)                 | 7 (15.2)   | 6 (13.0)  | 30 (10.0)  |      |     |
| Blended mode <sup>d</sup>                       | 13 (28.3)  | 11 (23.9) | 84 (28.0)  |      |     |
| Dosage of Medication <sup>e</sup>               |            |           |            | 1.87 | .11 |
| High                                            | 10 (21.7)  | 9 (19.6)  | 60 (20.0)  |      |     |
| Medium                                          | 28 (60.9)  | 29 (63.0) | 195 (65.0) |      |     |
| Low                                             | 8 (17.4)   | 8 (17.4)  | 45 (15.0)  |      |     |

Note: SCMP, Schizophrenia Care Management Program.

<sup>a</sup> denotes frequency (f %) or mean  $\pm$  standard deviation, and range.

<sup>b</sup> An analysis of variance (F-test, df= 498) or the Kruskal-Wallis test by ranks (H statistic, df= 2) was used to compare the socio-demographic variables of patients and their family caregivers among three groups.

<sup>c</sup> US\$1 = HK\$7.8

<sup>d</sup> Patients were taking more than one type of psychotropic medication such as the use of both conventional and atypical antipsychotic or atypical antipsychotic together with one anti-depressant.

<sup>e</sup> Dosage levels of neuroleptic medication were compared with the average dosage of medication taken by schizophrenic patients in Haloperidol equivalent mean values [14].
